# Supplementary material for: Using fluorine-containing amphiphilic random copolymers to manipulate the quantum yields of aggregation-induced emission fluorophores in aqueous solutions and the use of these polymers for fluorescent bioimaging
Source: Royal Society of Chemistry journal article supplement (doi:10.1039/c2jm30258f), 2012-01-01
Supplement: c2jm30258f.pdf [file c2jm30258f.pdf]

**Supplementary materials:**

**Using fluorine-containing amphiphilic random copolymers to manipulate the quantum efficiencies of aggregation-induced emission fluorophores in aqueous solutions and the use of these polymers for fluorescent bioimaging**

Hongguang Lu<sup>1,2,#</sup>, Fengyu Su<sup>1,#</sup>, Qian Mei<sup>1</sup>, Yanqing Tian<sup>1,\*</sup>, Wenjing Tian<sup>2</sup>, Roger H. Johnson<sup>1</sup>, Deirdre R. Meldrum<sup>1</sup>

1. Center for Biosignatures Discovery Automation, The Biodesign Institute, Arizona State University, 1001 S McAllister Ave, Tempe, AZ 85287
2. State Key Laboratory of Supramolecular Structure and Materials, College of Chemistry Jilin University, Changchun 130012, P.R. China

# Authors contributed equally

\* To whom correspondence should be addressed. Yanqing Tian ([Yanqing.Tian@asu.edu](mailto:Yanqing.Tian@asu.edu))

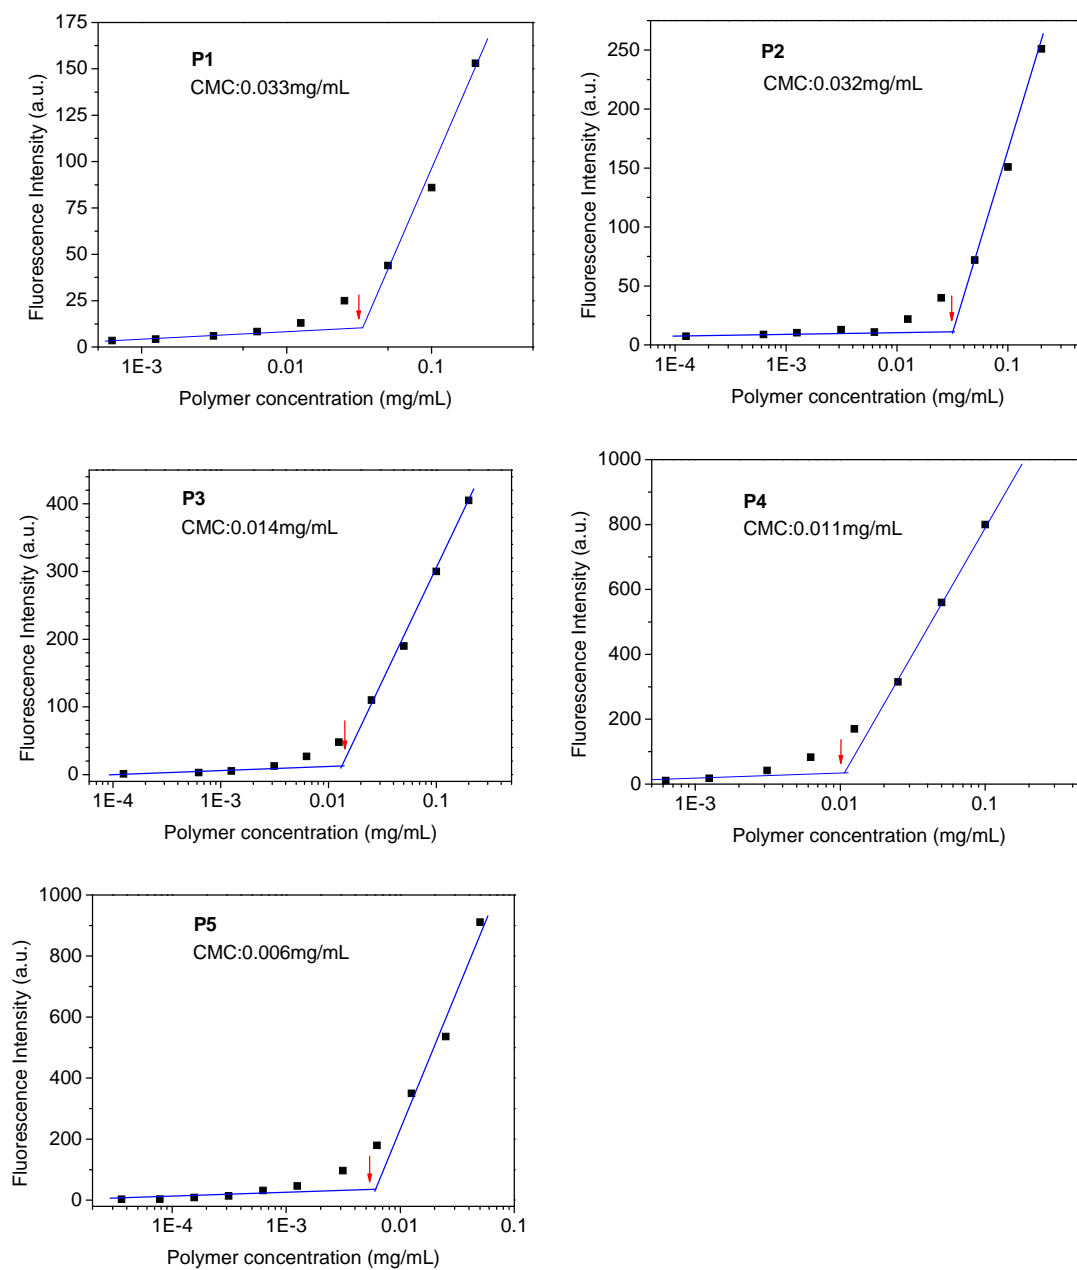

**S-Figure 1.** Polymer concentration dependent fluorescence for CMC determination of **P1** to **P5** in aqueous solutions.

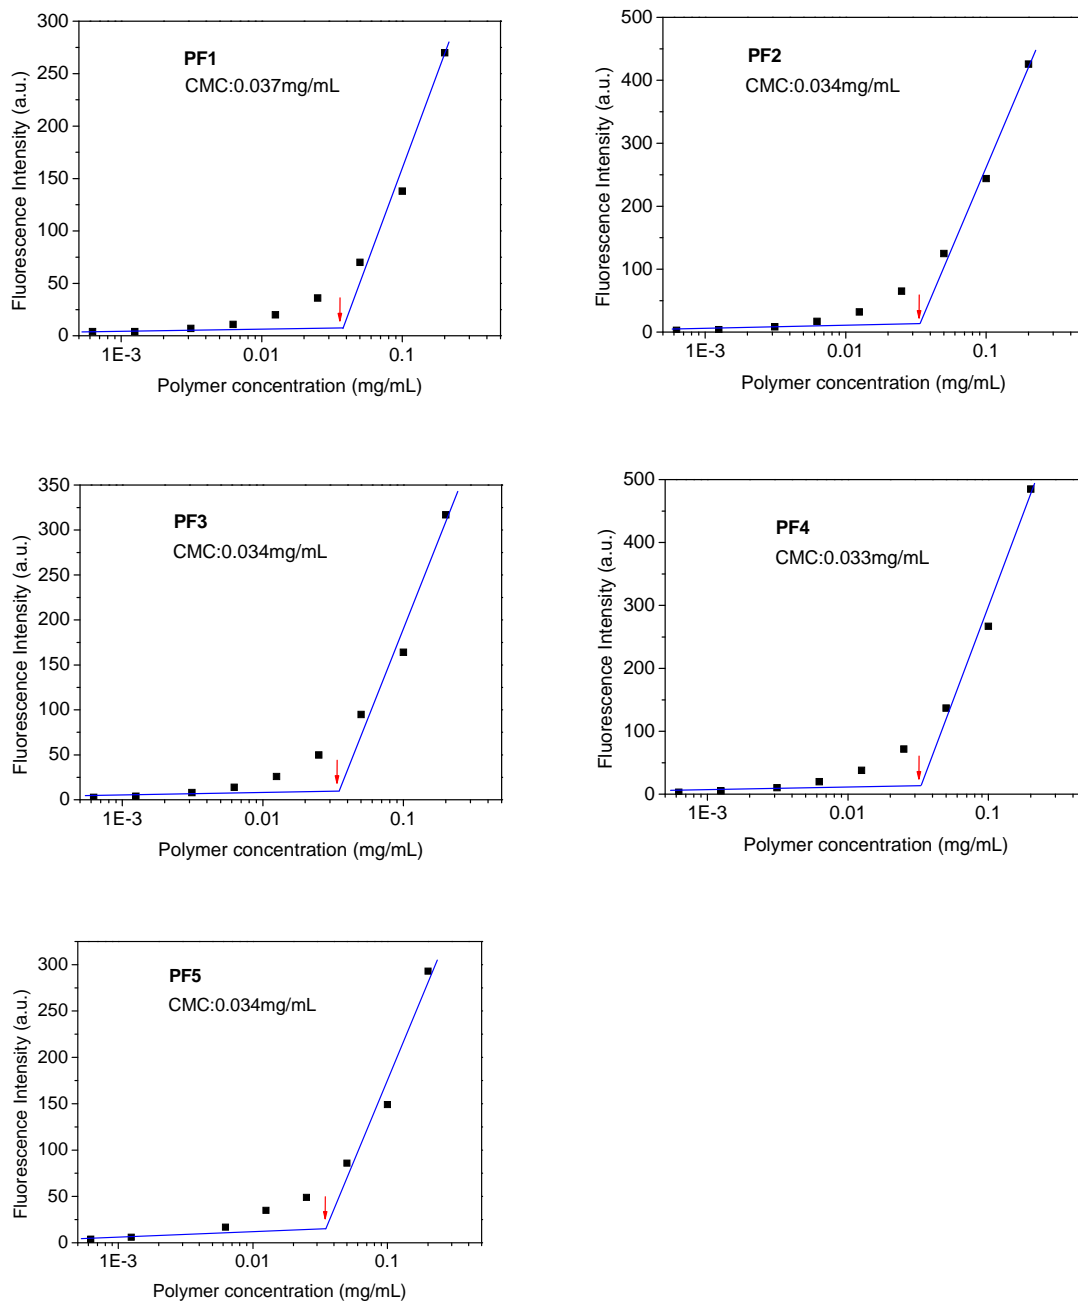

**S-Figure 2.** Polymer concentration dependent fluorescence for CMC determination of **PF1** to **PF5** in aqueous solutions.

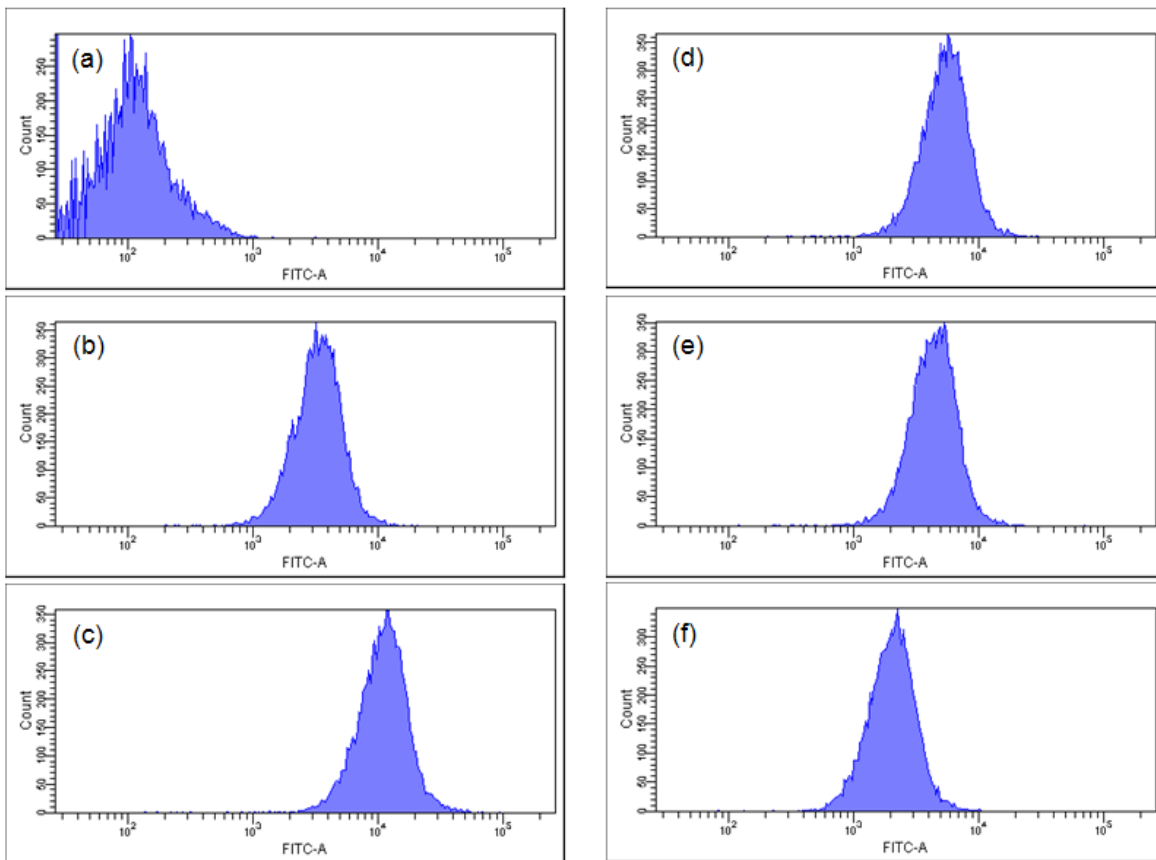

**S-Figure 3.** Flow cytometry of blank control (a), **P2** (b), **P3** (c), **PF2** (d), **PF3** (e), **PF4** (f) for 24 h by U87MG cells at 37 °C.

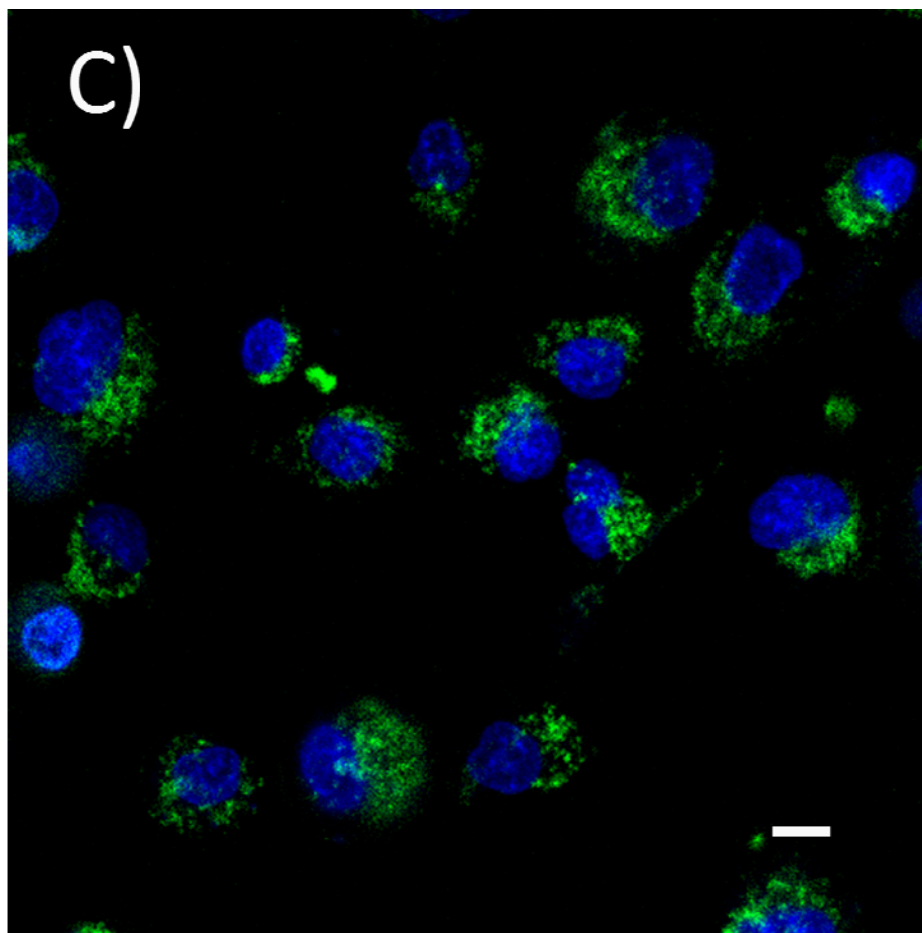

**S-Figure 4.** Magnified Figure 5C.

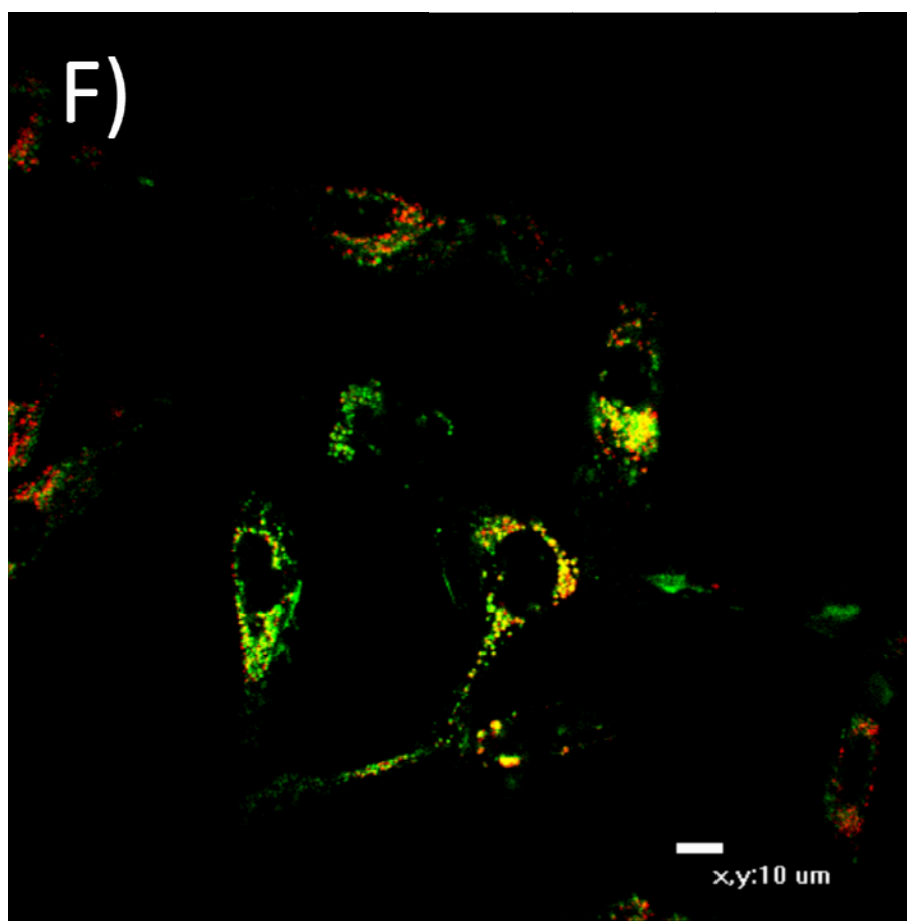

**S-Figure 5.** Magnified Figure 5F.

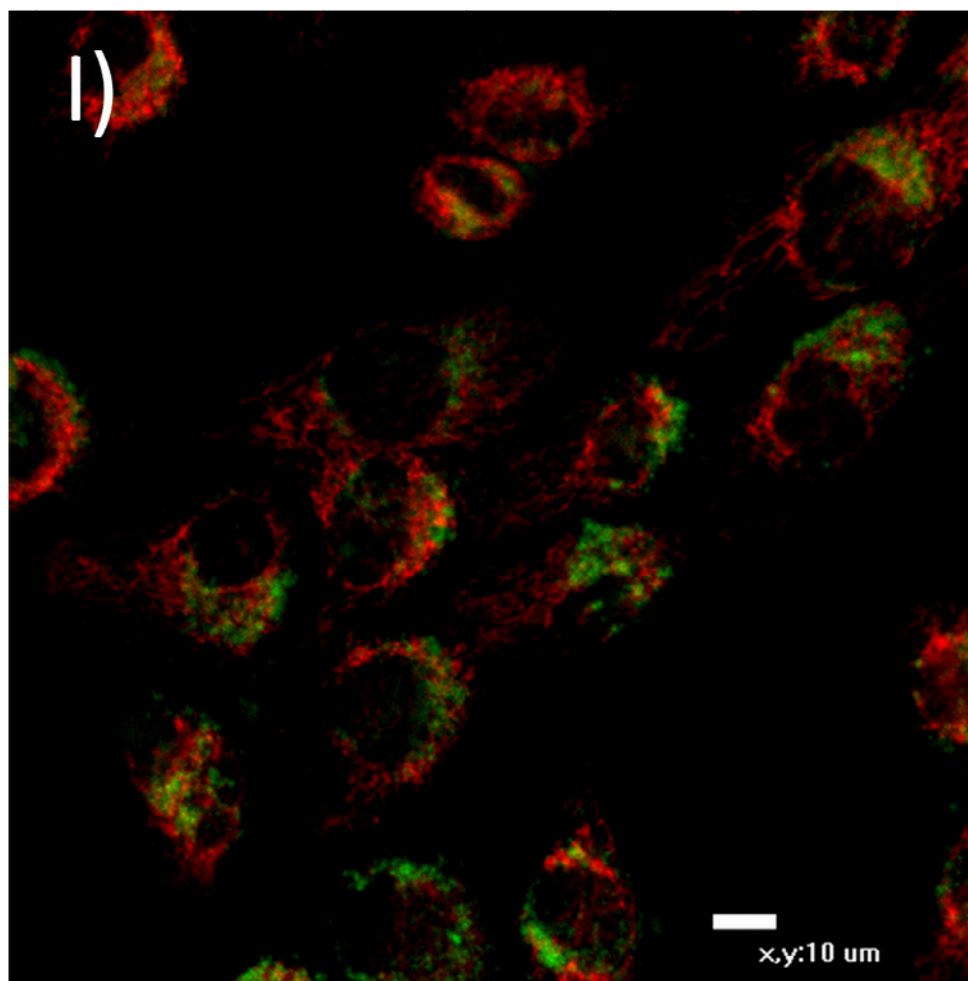

**S-Figure 6.** Magnified Figure 5I.
